# Supplementary material for: The SGLT2 Inhibitor Empagliflozin for the Treatment of Type 2 Diabetes Mellitus: a Bench to Bedside Review
Source: Springer Nature journal article supplement (doi:10.1007/s13300-014-0063-1), 2014-04-11
Supplement: MOESM1 [file 9263222]

- The sodium-glucose co-transporter 2 (SGLT2) inhibitors lower blood glucose via a novel mechanism of action (inhibition of re-uptake of filtered glucose in the kidney), and represent an insulin-independent treatment option.
- SGLT2 inhibitors have demonstrated good tolerability and efficacy, even in patients with significant co-morbidities.
- Co-administration of SGLT2 inhibitors is well tolerated in patients currently receiving other commonly prescribed medications, including antihypertensive agents, anti-clotting agents, and oral contraceptives.
- The SGLT2 inhibitor empagliflozin has demonstrated promising pharmacodynamic and pharmacokinetic properties.
- In clinical trials, empagliflozin has demonstrated a good efficacy and safety profile in a broad range of patients with type 2 diabetes mellitus (T2DM), and appears as an attractive adjunct therapeutic option for the treatment of T2DM.

This summary slide represents the opinions of the author. Article processing charges were funded by Boehringer Ingelheim. Medical writing assistance was provided by José L. Walewski, of Envision Scientific Solutions, and was funded by Boehringer Ingelheim. For a full list of acknowledgments and conflicts of interest for the author of this article, please see the full text online. Copyright © The Authors 2014. Creative Commons Attribution Noncommercial License (CC BY-NC).
